# Supplementary material for: Practice Guidelines for Outpatient Parenteral Antimicrobial Therapy (OPAT) in Germany
Source: Research Square preprint supplement (doi:10.21203/rs.3.rs-6895627/v1), 2025-06-25
Supplement: Supplementary file 1 [file 13074cef3d5985fb1e827778.docx]

**Supplement -** **Practice Guidelines for Outpatient Parenteral Antimicrobial Therapy (OPAT) in Germany**

Table 3: Practice Guidelines for Outpatient Parenteral Antimicrobial Therapy (OPAT) in Germany - Recommendations (full list)

| **Definition of OPAT, Indication, Setting, and Outpatient Therapy Management** | | | |
| --- | --- | --- | --- |
| **1** | How is OPAT defined? | OPAT refers to the intravenous (rarely also intramuscular) administration of AMT outside the inpatient setting. This includes the administration of antimicrobials in the home environment, outpatient clinics, doctor’s practices, or inpatient care facilities. | Strong consensus (100% agreement) |
| **2** | Who is responsible for setting the indication? | Identification of OPAT patients and the development of the treatment plan by an ID specialist is recommended. An ID specialist is defined as a "specialist in internal medicine and infectious diseases" or "clinical specialist with a focus on infectious diseases or additional training in infectious diseases." (according to the “German Medical Association” (Bundesärztekammer) as public corporations responsible for the medical self-management. Their work is based on the "Chamber Law for Health Care Professions") | Consensus (84% agreement) |
| **3** | Who is responsible for outpatient therapy management? | OPAT management should be conducted under the guidance of an ID specialist and in collaboration with GP. | Consensus (84% agreement) |
| **Which patients are suitable for OPAT?** | | | |
| **4** | How should patients be identified for OPAT? | It is recommended to use a checklist with selection criteria to identify patients with ID who are eligible for OPAT. | Strong consensus (100% agreement) |
| **5** | Where should patients be identified for OPAT? | OPAT patients should be identified both in the inpatient and outpatient settings. | Strong consensus (100% agreement) |
| **OPAT for Special Patient Groups** | | | |
| **6** | Is OPAT a therapy option for elder people? | The indication for OPAT should also be evaluated for elderly people. | Strong consensus (100% agreement) |
| **7** | Is OPAT a therapy option for people who inject drugs? | Patients who inject drugs should not be excluded from OPAT by default. | Strong consensus (100% agreement) |
| **8** | The AMT should be administered in an outpatient facility (e.g., substitution outpatient clinic). | Strong consensus (100% agreement) |
| **9** | The indication for the placement of a vascular catheter should be made based on very strict criteria and critically questioned to prevent misuse of the intravenous access. | Strong consensus (100% agreement) |
| **10** | Is OPAT a therapy option for homeless people? | Homeless people should not be excluded from OPAT by default. | Strong consensus (100% agreement) |
| **11** | The administration of antimicrobials should take place in an outpatient facility (e.g., clinic, doctor’s office, etc.). | Strong consensus (100% agreement) |
| **Vascular Access** | | | |
| **12** | Which type of intravenous access should be chosen? | The type of intravenous access should be selected based on the specific patient characteristics, the selected medication, the available infrastructure for insertion and maintenance, and most importantly, the planned duration of the AMT. | Strong consensus (100% agreement) |
| **13** | Who should be responsible for the selection of the vascular catheter? | The selection of the vascular access for OPAT should be made as part of the patient evaluation by the OPAT team. | Strong consensus (100% agreement) |
| **14** | How should intravenous accesses be managed during OPAT? | Regular dressing changes should be performed by trained individuals, as indicated by the manufacturer. | Strong consensus (100% agreement) |
| **15** | Patients should be examined regularly by their treating physicians to monitor intravenous access. | Strong consensus (100% agreement) |
| **Infectious Diseases** | | | |
| **16** | For which ID should OPAT be evaluated as a treatment option? | Any ID with an indication for therapy should be treated with OPAT, provided there is no oral therapy option, the patient selection criteria are met, and the infrastructure for outpatient care is available. | Strong consensus (100% agreement) |
| **Structural Requirements** | | | |
| **17** | Under what structural conditions should OPAT be considered? | Care by multidisciplinary OPAT teams, which work across sectors in both hospital and outpatient settings, should be a prerequisite for the implementation of OPAT. | Strong consensus (100% agreement) |
| **Professional Requirements and AMS** | | | |
| **18** | Should OPAT therapy be evaluated according to AMS principles? | OPAT should always be conducted in accordance with AMS principles. | Strong consensus (100% agreement) |
| **19** | What is the importance of evaluating oral therapy options? | Oral therapy should be preferred over parenteral therapy. | Strong consensus (100% agreement) |
| **Chemical-Physical Criteria for the Selection of an Anti-infective Agent** | | | |
| **20** | What chemical-physical criteria should be considered when selecting an anti-infective for OPAT? | The chemical-physical criteria to be considered when selecting an AMT for OPAT include:   - Correct dosage and dosage intervals of the AMT - Robust stability data of the AMT - Additional physical and chemical properties of the active substance in relation to the infusion system, solvent, concentration, the use of stability-supporting buffers, and temperature - Side effects (adverse drug reactions) - Interactions with concomitant medication | Strong consensus (100% agreement) |
| **Stability Criteria for Selecting an Anti-infective Agent** | | | |
| **21** | What stability criteria should be used to classify an anti-infective as suitable for OPAT? | An antimicrobial should be classified as suitable for OPAT based on its stability with regard to temperature and time. | Strong consensus (100% agreement) |
| **22** | An antimicrobial should be classified as suitable for OPAT based on its stability regarding maximum concentration, solvent, and buffer. | Strong consensus (100% agreement) |
| **Role of the OPAT Team Regarding the Preparation, Storage, Transport, and Dispensing of Antimicrobials** | | | |
| **23** | What is the role of the OPAT team regarding the preparation, storage, transport, and dispensing of antimicrobials? | Interdisciplinary collaboration within the multi-professional and cross-sector OPAT team should ensure that the processes related to the preparation, storage, transport, and dispensing of antimicrobials for OPAT patients are safe. | Strong consensus (100% agreement) |
| **Outpatient Treatment Setting** | | | |
| **24** | In which outpatient treatment situations should OPAT be performed? | The selection of the appropriate treatment setting should be made individually for each patient, depending on compliance, the duration and frequency of administration, the substance, patient factors, and the social environment. | Strong consensus (100% agreement) |
| **Control Appointments During OPAT** | | | |
| **25** | Should regular clinical and laboratory checks be performed for patients receiving OPAT? | OPAT patients should be regularly assessed for clinical and laboratory treatment response, tolerability of AMT, and the early detection of complications. | Strong consensus (100% agreement) |
| **26** | How frequently should outpatient follow-up examinations be conducted? | Follow-up visits should occur weekly, or more frequently if necessary. | Strong consensus (100% agreement) |
| **27** | Who should conduct the outpatient follow-up examinations? | The management of OPAT should be overseen by an ID specialist, in coordinated collaboration with GP, to ensure the safety, efficacy, and continuity of care. | Strong consensus (100% agreement) |
